# Supplementary material
Source: Research Square preprint supplement (doi:10.21203/rs.3.rs-9909086/v1)
Supplement: Supplementary file 1 [file 2639b9478902a5dfdc228f28.docx]

**Tab.1 Comparison of baseline data among the three groups**

| Baseline data | Group  (mean ± standard deviation) | | | **F/χ²** | **p** |
| --- | --- | --- | --- | --- | --- |
|  | **FTCL(n=71)** | **PTCL A(n=31)** | **PTCL B(n=38)** |  |  |
| Age (years) | 72.31±7.71 | 71.61±6.96 | 71.92±8.03 | 0.097 | 0.907 |
| Sex (female/male, n) | 58/13 | 24/7 | 34/4 | 1.885 | 0.390 |
| Side (left/right, n) | 24/47 | 18/13 | 17/21 | 5.353 | 0.069 |
| Operation duration (min) | 124.99±23.87 | 131.00±34.48 | 127.00±41.40 | 0.385 | 0.681 |
| Follow-up (months) | 23.06±2.74 | 23.10±2.77 | 23.82±2.52 | 1.072 | 0.345 |
| BMI（kg/m²） | 26.82±2.82 | 27.97±3.79 | 27.45±3.27 | 1.524 | 0.222 |
| Preoperative knee flexion (°) | 104.58±16.27 | 106.39±10.94 | 106.68±13.23 | 0.330 | 0.719 |
| Preoperative VAS score | 5.85±2.33 | 6.10±1.25 | 5.84±0.89 | 0.232 | 0.793 |
| Preoperative OKS score | 29.66±7.53 | 30.26±7.34 | 30.89±8.15 | 0.326 | 0.722 |
| Preoperative HSS score | 57.30±12.00 | 57.45±11.96 | 56.16±12.35 | 0.135 | 0.874 |

**Tab.2 Comparison of postoperative functional scores among the three groups (FDR‑adjusted, with 95% CI)**

| **Time point** | **Score** | **Group comparison** | **Mean ± SD** | **Mean difference**  **(95% CI)** | **Raw P** | **FDR-adjusted Q** |
| --- | --- | --- | --- | --- | --- | --- |
| 1 month | VAS | PTCLA vs. FTCL | 3.52±1.23 vs. 3.08±1.11 | 0.44 (-0.06 to 0.94) | 0.083 | 0.332 |
|  |  | PTCLB vs. FTCL | 3.39±1.20 vs. 3.08±1.11 | 0.31 (-0.14 to 0.76) | 0.178 | 0.534 |
|  | OKS | PTCLA vs. FTCL | 35.65±7.63 vs. 35.17±9.03 | 0.48 (-3.19 to 4.15) | 0.798 | 0.957 |
|  |  | PTCLB vs. FTCL | 38.21±7.29 vs. 35.17±9.03 | 3.04 (-0.32 to 6.40) | 0.077 | 0.328 |
|  | HSS | PTCLA vs. FTCL | 78.19±5.07 vs. 80.79±6.40 | -2.60 (-5.19 to -0.01) | 0.048 | 0.256 |
|  |  | PTCLB vs. FTCL | 79.66±5.12 vs. 80.79±6.40 | -1.13 (-3.48 to 1.22) | 0.350 | 0.746 |
| 3 months | VAS | PTCLA vs. FTCL | 2.23±0.50 vs. 1.86±0.72 | 0.37 (0.08 to 0.66) | 0.012 | 0.072 |
|  |  | PTCLB vs. FTCL | 2.53±1.11 vs. 1.86±0.72 | 0.67 (0.32 to 1.02) | <0.001 | <0.024 |
|  | OKS | PTCLA vs. FTCL | 40.16±6.20 vs. 44.37±7.67 | -4.21 (-7.32 to -1.10) | 0.008 | 0.048 |
|  |  | PTCLB vs. FTCL | 39.79±6.05 vs. 44.37±7.67 | -4.58 (-7.44 to -1.72) | 0.002 | 0.024 |
|  | HSS | PTCLA vs. FTCL | 86.52±6.11 vs. 86.55±5.06 | -0.03 (-2.51 to 2.45) | 0.977 | 0.977 |
|  |  | PTCLB vs. FTCL | 86.13±5.45 vs. 86.55±5.06 | -0.42 (-2.52 to 1.68) | 0.690 | 0.920 |
| 12 months | VAS | PTCLA vs. FTCL | 1.16±0.45 vs. 1.23±0.59 | -0.07 (-0.32 to 0.18) | 0.592 | 0.860 |
|  |  | PTCLB vs. FTCL | 1.11±0.39 vs. 1.23±0.59 | -0.12 (-0.33 to 0.09) | 0.261 | 0.626 |
|  | OKS | PTCLA vs. FTCL | 50.29±5.21 vs. 52.97±3.04 | -2.68 (-4.32 to -1.04) | 0.002 | 0.016 |
|  |  | PTCLB vs. FTCL | 51.79±3.41 vs. 52.97±3.04 | -1.18 (-2.44 to 0.08) | 0.066 | 0.288 |
|  | HSS | PTCLA vs. FTCL | 88.74±6.42 vs. 83.93±8.62 | 4.81 (-0.21 to 9.83) | 0.922 | 0.957 |
|  |  | PTCLB vs. FTCL | 87.58±6.93 vs. 83.93±8.62 | 3.65 (-0.99 to 8.29) | 0.394 | 0.787 |
| Final follow-up | VAS | PTCLA vs. FTCL | 1.00±0.58 vs. 0.83±0.51 | 0.17 (-0.06 to 0.40) | 0.141 | 0.451 |
|  |  | PTCLB vs. FTCL | 1.03±0.49 vs. 0.83±0.51 | 0.20 (-0.01 to 0.41) | 0.055 | 0.264 |
|  | OKS | PTCLA vs. FTCL | 56.45±2.38 vs. 56.55±1.96 | -0.10 (-1.05 to 0.85) | 0.829 | 0.957 |
|  |  | PTCLB vs. FTCL | 57.00±0.77 vs. 56.55±1.96 | 0.45 (-0.20 to 1.10) | 0.177 | 0.534 |
|  | HSS | PTCLA vs. FTCL | 94.94±2.67 vs. 94.68±3.35 | 0.26 (-1.10 to 1.62) | 0.704 | 0.920 |
|  |  | PTCLB vs. FTCL | 95.21±2.58 vs. 94.68±3.35 | 0.53 (-0.69 to 1.75) | 0.394 | 0.787 |

**Tab.3 Comparison of prosthetic kinematic characteristics at the final follow-up among the three groups**

| Variable | FTCL group (n=71) | **PTCL** | | | | | | | | | | |
| --- | --- | --- | --- | --- | --- | --- | --- | --- | --- | --- | --- | --- |
| PTCLA group (n=31) | t  value | | P  value | | | PTCLB group (n=38) | t  value | | P value | |
| FTA (°) | 2.61±1.26 | 3.23±1.43 | | -2.194 | | 0.031 | 3.03±1.37 | | | -1.614 | | 0.109 |
| s-FEA(°) | 6.61±2.27 | 5.55±2.33 | | 1.949 | | 0.049 | 6.39±1.65 | | | 0.505 | | 0.615 |
| c-VAF(°) | -0.46±5.25 | 0.13±5.08 | | -0.530 | | 0.597 | 0.08±5.73 | | | -0.499 | | 0.619 |
| c-VAT(°) | 0.73±1.99 | 0.13±2.87 | | 1.223 | | 0.224 | 0.08±3.22 | | | 1.306 | | 0.194 |
| PTS(°) | 6.65±3.06 | 7.32±2.79 | | -1.052 | | 0.295 | 6.82±3.52 | | | -0.259 | | 0.796 |

**Tab.4 Comparison of M/L ratio, functional improvement, and adverse events among the three groups**

| Variable | FTCL group (n=71) | PTCLA group (n=31) | PTCLB group (n=38) | Statistic |
| --- | --- | --- | --- | --- |
| M/L ratio | 0.25±0.05a | 0.49±0.08c | 0.37±0.09b | F=114.781  P=<0.001 | |
| OKS improvement (preoperative to final follow-up) | 23.11±4.01 | 23.35±3.96 | 23.95±4.05 | F=0.547  P=0.580 | |
| Adverse events (n) | 2/71 | 1/31 | 1/38 | - | |
| Bearing dislocation |  | 1 |  | - | |
| Tibial component loosening |  |  | 1 | - | |
| Tibial periprosthetic fracture | 1 |  |  | - | |
| Lateral compartment pain | 1 |  |  | - | |

M/L ratio: medial/lateral joint space ratio

Different superscript letters indicate statistically significant differences between groups (P < 0.05).
