# Supplementary material
Source: Research Square preprint supplement (doi:10.21203/rs.3.rs-9909086/v1)
Supplement: Supplementary file 2 [file 4deb19f4199083b33dea602a.xlsx]

## Sheet: Sheet1
患者姓名	组别	性别	年龄	手术时长	侧别	随访时间	BMI	术前膝关节屈曲度（°）	术前VAS评分	术前OKS评分	术前AKS-Knee评分	术前AKS-Function评分	术前HSS评分	术前内外侧高度比		并发症（假体翻修率、不良事件发生率等）	术后1个月VAS评分	术后3个月VAS评分	术后6个月VAS评分	术后12个月VAS评分	术后2年VAS评分	术后1个月OKS评分	术后3个月OKS评分	术后6个月OKS评分	术后12个月OKS评分	术后2年OKS评分	术后1个月AKS-Knee评分	术后3个月AKS-Knee评分	术后6个月AKS-Knee评分	术后12个月AKS-Knee评分	术后2年AKS-Knee评分	术后1个月AKS-Function评分	术后3个月AKS-Function评分	术后6个月AKS-Function评分	术后12个月AKS-Function评分	术后2年AKS-Function评分	术后1个月HSS评分	术后3个月HSS评分	术后6个月HSS评分	术后12个月HSS评分	术后2年HSS评分	假体的股胫角°	股骨假体屈曲角°	股骨假体内/外翻角°	胫骨后倾角°	胫骨假体内翻角°
黄新酱	PTCL A	男	65	112	左	25	29	90	6	18	43	48	65	0.42		有	2	2	1	1	1	36	42	45	53	48	47	58	78	87	92	68	72	78	85	90	76	86	89	90	96	3	6	3	8	2
郭翠兰	PTCL A	女	74	125	右	21	25	120	7	43	38	43	42	0.58			3	2	2	1	2	28	35	52	48	56	51	64	70	85	89	61	68	74	90	89	79	89	92	84	92	4	4	-5	5	-3
张晓玲	PTCL A	女	81	114	右	27	32	115	4	22	46	52	70	0.47			3	3	3	2	1	44	48	38	58	58	46	68	68	89	94	75	76	83	80	91	81	73	87	95	99	2	8	7	10	4
潘锦兰	PTCL A	女	64	120	右	19	23	98	5	37	35	41	58	0.53			6	2	1	1	0	26	31	47	44	57	49	71	71	83	91	57	63	69	85	90	74	91	94	80	94	5	3	-2	4	-1
刘秀菊	PTCL A	女	81	125	右	24	30	105	8	31	42	49	61	0.49			4	2	2	1	1	39	44	41	52	56	40	74	69	88	93	70	79	86	75	88	83	87	90	92	90	1	7	4	9	0
袁春娣	PTCL A	女	82	90	左	22	26	112	5	26	39	44	48	0.6			3	3	1	1	1	31	37	56	48	57	51	82	73	86	90	64	71	77	90	92	77	84	88	86	97	3	5	-6	6	3
黄旭琼	PTCL A	女	71	110	右	26	33	124	5	40	44	51	75	0.41			3	2	1	2	2	47	50	33	57	58	47	57	67	90	95	77	67	72	85	90	80	92	63	96	93	4	9	8	11	-4
杨焕枝	PTCL A	女	76	145	左	20	24	93	7	19	37	42	53	0.55			6	2	3	1	1	29	33	49	42	58	45	64	69	84	88	59	49	80	80	87	55	88	89	82	97	2	2	-1	5	1
伍卫东	PTCL A	女	84	95	右	25	31	92	7	34	45	50	36	0.46			3	3	2	1	1	41	46	44	57	57	50	68	72	88	92	72	69	76	85	93	82	85	71	93	95	6	6	2	8	-2
谭素娥	PTCL A	女	74	90	左	21	27	101	6	28	36	45	62	0.52			5	2	1	1	1	33	39	58	49	56	51	70	82	85	91	66	74	81	96	90	78	90	86	87	91	3	4	-4	7	5
谢丽珠	PTCL A	女	73	125	左	27	34	110	8	41	43	53	67	0.44			3	2	1	1	1	48	30	37	59	57	44	74	68	89	89	78	64	68	90	86	79	82	95	97	98	2	8	6	12	-3
欧壬柳	PTCL A	女	68	175	左	19	25	95	6	23	40	43	44	0.57			2	3	2	1	2	30	43	50	45	58	47	80	70	83	94	60	51	88	85	94	77	93	90	83	94	4	3	-3	4	0
龙越枝	PTCL A	男	69	160	右	24	29	122	5	38	44	48	71	0.5			4	2	3	1	1	37	36	42	54	56	46	56	69	87	92	69	70	74	80	90	81	86	88	91	96	1	7	5	9	2
谢石桃	PTCL A	女	60	120	左	22	22	107	7	32	38	41	55	0.43			3	2	1	2	1	27	49	55	46	57	51	63	71	84	93	58	75	82	85	85	76	89	92	81	92	5	5	-7	5	-3
温演有	PTCL A	男	78	100	右	26	32	99	4	27	46	52	60	0.56			5	3	2	1	0	45	32	39	52	56	49	68	75	90	90	76	66	70	90	95	84	84	89	94	99	3	9	1	10	4
吴燕珍	PTCL A	女	70	130	左	20	26	113	6	42	37	44	39	0.48			2	2	1	1	1	32	45	48	43	58	47	70	68	82	95	63	82	89	75	90	78	91	93	85	95	4	2	-5	6	-1
何焕娣	PTCL A	女	57	120	左	25	30	91	8	20	45	50	73	0.59			3	2	1	1	1	42	38	43	47	57	51	74	70	88	91	73	73	70	85	89	80	87	87	98	91	2	6	4	8	3
李仕香	PTCL A	女	74	175	右	21	23	125	5	35	39	42	50	0.51			4	1	3	1	1	25	41	53	50	56	46	79	69	85	89	56	68	71	80	91	75	83	94	79	98	3	4	-8	3	-4
陈间	PTCL A	女	74	115	左	27	33	104	5	29	43	49	66	0.42			3	2	2	1	0	38	34	40	60	57	30	55	74	89	94	71	77	84	85	90	82	92	90	93	94	5	8	3	11	1
梁欢容	PTCL A	女	72	130	左	19	25	117	7	39	36	43	41	0.28			2	2	1	1	1	29	47	51	48	58	51	63	66	83	92	62	65	73	45	88	77	88	88	83	97	1	3	-2	5	-2
陈瑞开	PTCL A	女	66	125	左	24	31	108	7	24	44	51	69	0.45			3	2	2	1	1	46	40	46	55	57	42	67	70	87	90	74	78	82	85	92	79	85	92	96	93	4	7	7	9	5
陈亚六	PTCL A	女	73	110	左	22	24	96	6	33	38	44	57	0.58			5	2	1	1	1	30	42	57	44	57	47	70	70	84	93	55	72	80	90	90	81	90	89	81	97	3	5	-4	4	0
刘祖辉	PTCL A	男	68	105	右	26	34	119	8	21	45	52	74	0.47			6	2	1	1	1	40	35	34	52	58	51	73	71	90	91	68	69	67	85	87	74	81	91	94	96	2	9	5	10	-3
钟志雄	PTCL A	男	64	110	右	20	26	102	6	36	37	41	47	0.53			4	3	2	1	2	26	48	36	43	48	46	78	74	82	95	60	79	90	80	93	83	94	86	84	92	6	2	-6	6	2
何秀芳	PTCL A	女	77	170	右	25	30	111	5	25	46	50	63	0.49			3	2	3	1	1	43	31	54	56	57	49	53	69	88	89	77	67	77	75	90	78	86	95	97	99	3	6	2	8	-3
曾淑瑶	PTCL A	女	78	110	左	21	22	94	7	30	39	43	52	0.6			3	2	1	1	1	31	44	35	45	58	51	62	70	85	92	64	74	69	90	86	80	89	90	82	95	4	4	-3	3	4
陈月金	PTCL A	女	76	210	左	27	32	123	4	30	44	49	35	0.41			2	3	1	1	1	49	37	45	52	56	47	66	68	89	94	72	71	85	85	94	76	84	88	95	91	1	8	8	11	-1
熊文丰	PTCL A	男	71	245	右	19	25	106	6	25	38	42	68	0.55			4	2	2	1	0	28	50	47	47	57	46	69	69	83	91	57	80	69	80	90	82	91	93	80	98	5	3	-5	5	3
宁海燕	PTCL A	女	69	115	左	24	31	100	8	36	43	51	59	0.24			3	2	2	3	1	39	33	42	53	58	51	73	45	87	90	76	68	82	85	89	77	87	89	98	94	2	7	1	9	-4
植就芬	PTCL A	男	56	145	左	22	24	114	5	21	37	44	72	0.52			5	3	3	1	2	25	46	50	46	56	45	77	71	84	93	62	75	76	97	91	79	63	92	83	97	3	5	-7	4	1
杨桂梅	PTCL A	女	75	140	左	26	29	92	6	33	45	48	49	0.44			2	2	2	1	0	41	39	38	54	57	71	51	70	90	92	70	70	71	90	90	81	92	87	92	93	4	10	6	12	-2
江惠燕	PTCL B	女	71	135	左	26	28	112	5	24	46	53	64	0.38			4	1	1	1	1	36	30	52	52	58	47	62	69	88	95	68	46	88	85	88	82	88	94	91	97	2	7	4	8	5
欧细女	PTCL B	女	51	140	左	23	25	94	7	39	38	44	37	0.42			3	3	2	1	1	31	43	44	48	57	41	66	70	86	89	62	66	78	80	92	77	85	90	84	96	3	5	-6	4	0
李荷姑	PTCL B	女	77	110	左	27	31	124	4	29	52	60	56	0.37			2	4	1	1	1	45	36	49	55	56	51	69	67	90	91	74	76	83	85	90	86	90	88	95	92	5	8	8	11	-5
关盛雄	PTCL B	男	67	150	左	20	23	88	6	35	34	41	70	0.45			5	2	1	2	1	30	49	41	46	57	46	73	71	84	94	58	69	63	75	87	73	82	92	79	99	1	4	-3	3	2
邓发妹	PTCL B	女	75	85	右	25	29	118	5	20	48	55	45	0.39			3	1	3	1	1	39	32	55	53	56	49	77	68	89	92	70	82	86	90	93	81	93	89	93	95	4	6	5	9	-3
冯九娣	PTCL B	女	60	90	左	22	26	101	7	42	41	47	61	0.47			5	3	2	1	2	33	45	37	52	57	51	42	70	87	90	64	71	70	85	90	78	86	91	86	91	3	5	-7	5	4
李秀文	PTCL B	女	75	105	右	27	32	128	5	27	55	62	38	0.38			3	2	1	1	1	48	38	53	56	58	47	61	69	91	93	76	77	72	80	89	84	89	86	96	98	2	7	7	12	-1
黄章鹏	PTCL B	男	72	150	右	21	24	97	6	32	37	43	71	0.41		有	4	4	1	1	1	32	41	46	52	56	46	66	74	85	91	60	68	89	85	91	75	84	95	81	94	6	4	-2	2	3
陈枚英	PTCL B	女	60	95	右	26	30	115	7	38	49	57	54	0.37		有	3	2	2	2	1	41	34	48	54	57	45	69	66	90	95	72	78	79	46	90	83	91	90	92	97	3	8	3	10	-4
江惠燕	PTCL B	女	82	140	右	23	27	90	5	23	42	48	65	0.44			2	3	3	1	1	35	47	39	53	58	51	72	70	86	89	65	70	84	85	88	79	67	88	85	93	4	6	-5	4	1
谢惠明	PTCL B	女	75	130	右	27	33	121	6	41	56	63	40	0.38			3	2	1	1	1	49	40	56	57	57	73	77	72	92	92	77	79	70	90	92	85	83	63	94	97	1	9	8	11	-2
张祥友	PTCL B	女	77	95	右	20	25	103	7	28	39	45	75	0.46			2	1	2	1	1	34	42	43	49	57	49	38	70	84	94	61	67	87	85	90	74	92	89	80	96	5	5	-4	3	5
孙金弟	PTCL B	女	70	100	左	25	28	110	5	34	47	54	46	0.39			3	2	1	1	2	38	35	51	52	56	51	61	71	89	91	69	80	77	80	86	82	88	92	94	92	2	7	6	8	0
冯九娣	PTCL B	女	76	105	右	22	22	92	6	19	35	40	62	0.43			4	3	1	1	1	30	48	40	48	58	46	66	68	85	93	57	72	73	75	94	76	85	87	83	99	3	4	-8	5	-5
欧壬柳	PTCL B	女	69	115	右	26	31	126	5	40	51	59	43	0.56			3	2	2	2	1	46	31	57	55	57	47	68	73	91	90	75	81	85	90	90	87	90	94	96	95	4	8	2	12	2
叶德连	PTCL B	女	82	120	右	21	24	99	7	26	40	46	66	0.48			7	5	1	1	0	33	44	45	46	56	51	72	69	83	92	63	69	69	85	89	72	81	90	78	91	2	6	-6	2	-3
丘扬娣	PTCL B	女	69	145	右	27	29	116	5	31	53	61	51	0.37			3	2	3	1	1	42	37	42	53	57	40	76	69	90	95	71	76	85	80	91	81	94	88	93	98	3	9	7	9	4
李映茹	PTCL B	女	77	105	左	23	26	89	6	37	36	42	73	0.42			5	3	2	1	2	31	50	49	49	58	45	32	70	86	89	59	68	71	85	90	77	86	92	82	94	5	5	-3	4	-1
谢丽华	PTCL B	女	68	85	右	26	32	123	7	22	50	56	48	0.41			5	5	1	1	1	47	33	38	56	58	46	60	39	92	91	73	82	76	98	88	85	79	89	95	97	1	7	4	11	3
麦琼英	PTCL B	女	78	120	右	20	23	105	5	43	38	44	60	0.45			3	2	1	1	1	34	46	50	47	57	51	65	71	84	94	62	70	68	90	92	74	84	91	79	93	4	4	-7	3	-3
梁合玲	PTCL B	女	78	145	右	25	30	113	6	18	52	60	35	0.39			2	3	2	1	1	40	39	44	54	56	68	68	67	91	92	68	77	88	85	90	83	91	86	94	97	3	8	8	10	1
吴亚子	PTCL B	女	57	320	右	22	25	95	7	19	34	41	72	0.38			3	5	3	2	1	30	30	47	50	57	35	72	68	85	93	56	66	78	80	87	78	87	95	81	96	2	6	-2	5	-2
陆灶姐	PTCL B	女	58	115	右	27	31	125	5	28	48	57	53	0.37			2	3	1	1	0	51	43	41	57	58	50	76	70	93	90	74	78	76	85	93	86	83	90	96	92	4	9	5	11	5
黄苏女	PTCL B	女	79	115	右	21	24	98	6	37	41	47	67	0.38			4	3	2	1	1	32	36	54	45	56	51	88	70	83	91	64	71	71	90	90	73	92	88	80	99	3	5	-8	2	2
陈苏女	PTCL B	女	58	150	左	26	29	117	5	41	55	62	44	0.39			3	2	1	1	2	44	49	36	52	57	46	60	69	90	95	70	79	89	75	89	84	88	73	93	95	5	7	3	8	-5
邱云清	PTCL B	女	72	120	左	23	26	91	7	22	37	43	74	0.31			3	1	1	1	1	35	32	52	48	56	69	65	72	86	89	60	69	77	85	91	76	85	89	79	91	1	4	-5	4	2
吴群想	PTCL B	女	74	170	右	27	32	127	5	33	49	58	55	0.37			2	2	2	1	0	50	45	39	55	58	45	68	68	92	92	76	80	83	90	90	88	90	92	95	98	4	8	8	11	-2
吴瑞珍	PTCL B	女	72	150	左	20	23	102	6	26	42	48	69	0.38			3	3	3	0	1	33	38	53	46	57	51	71	71	84	94	63	73	70	47	88	71	82	87	82	94	2	6	-4	3	4
莫富龙	PTCL B	男	79	105	左	25	30	111	7	40	56	63	42	0.38			3	2	1	1	1	43	41	46	53	56	46	76	70	91	91	72	81	87	85	92	82	93	94	94	97	3	9	6	9	-1
方得爱	PTCL B	女	67	85	左	22	25	93	5	31	39	45	63	0.37			4	1	1	1	1	31	34	48	49	57	49	95	69	85	93	58	68	75	90	90	75	86	90	80	93	4	5	-7	5	3
何趣娴	PTCL B	女	74	165	左	26	31	122	6	18	47	55	50	0.38			6	2	2	1	0	52	47	43	56	58	47	59	74	93	90	75	48	72	85	86	87	89	88	96	97	1	7	2	12	-4
韦晓明	PTCL B	女	75	91	左	21	24	100	7	43	35	40	36	0.19			3	3	1	2	1	30	40	55	50	57	51	65	68	83	92	61	70	86	80	94	74	84	92	78	96	5	4	-8	2	1
谭惠定	PTCL B	女	80	105	左	27	29	114	5	24	51	59	68	0.21			3	2	3	1	1	37	42	37	54	57	43	68	69	90	95	69	82	74	90	90	85	91	89	93	92	2	8	5	10	-2
李惠芳	PTCL B	女	72	195	左	23	26	87	6	35	40	46	57	0.18			5	4	2	1	1	32	35	51	52	58	46	70	70	86	89	57	69	85	75	89	73	87	91	81	99	3	6	-3	4	5
方坚平	PTCL B	男	82	125	右	26	32	119	7	20	53	61	70	0.19			2	2	1	1	1	53	48	40	57	56	47	75	67	92	91	73	78	79	85	91	86	83	86	95	95	4	9	7	11	0
罗素珍	PTCL B	女	80	125	左	20	23	96	5	38	36	42	49	0.19			4	1	1	1	1	34	31	56	53	57	51	90	70	84	94	62	71	84	90	90	75	72	95	79	91	2	5	-5	3	-5
宋惠卿	PTCL B	女	83	130	右	25	30	108	6	29	50	56	64	0.21			3	3	2	1	1	41	44	45	52	58	45	58	69	91	92	71	79	68	99	88	84	88	90	94	98	3	7	4	8	2
刘怎娣	PTCL B	女	62	95	右	22	25	85	5	42	38	44	41	0.19			2	2	3	1	2	30	37	42	52	56	27	65	71	85	90	59	67	81	90	92	76	85	88	82	94	1	6	-6	5	-3
赵云芝	FTCL	女	83	95	右	25	27	112	8	23	47	52	75	0.28		有	3	2	1	2	1	37	43	50	50	57	51	68	70	81	93	70	80	76	87	90	82	90	89	93	97	3	8	8	8	1
李明太	FTCL	男	73	95	右	22	25	97	5	32	39	38	52	0.23		有	4	1	2	1	1	30	37	38	53	58	46	71	68	88	91	57	72	73	79	87	76	81	83	88	93	2	8	-5	10	-1
林康水	FTCL	男	77	95	右	26	29	118	7	21	53	61	65	0.32			3	3	1	1	0	45	52	49	58	56	47	75	93	90	95	73	81	89	94	93	88	94	94	91	96	4	5	0	5	3
梁丽群	FTCL	女	83	115	右	20	23	103	3	36	35	33	38	0.19			2	2	1	1	1	39	34	44	51	57	50	85	69	84	89	61	68	77	74	90	73	86	78	69	96	1	9	-7	7	-2
陆献青	FTCL	女	71	100	左	24	28	121	8	27	49	55	71	0.26			3	1	2	1	1	22	47	47	56	58	51	57	71	87	92	71	76	82	89	89	84	89	91	92	92	3	6	3	3	2
蔡纯招	FTCL	女	60	140	右	21	26	106	4	39	42	42	56	0.3			6	2	1	1	1	49	40	41	54	57	46	64	70	91	94	59	70	69	82	91	78	84	85	90	99	2	10	-9	11	0
吴立平	FTCL	男	73	90	右	27	30	94	8	25	55	64	60	0.21			2	3	3	1	0	31	55	53	53	56	47	68	68	86	91	74	82	90	95	90	89	91	95	87	95	4	4	5	6	4
饶细花	FTCL	女	66	140	右	19	24	115	2	34	37	36	39	0.34			5	1	2	1	1	44	36	39	49	57	51	70	70	89	93	62	69	78	76	88	74	87	80	93	91	1	7	-2	4	-3
梁顺英	FTCL	女	75	130	左	25	29	99	7	30	51	58	72	0.18			3	2	1	1	1	28	49	52	57	56	45	74	73	85	90	70	77	83	91	92	85	83	92	88	98	3	3	7	9	1
陈凤枝	FTCL	女	68	95	右	22	25	109	8	18	44	44	54	0.27			2	2	1	1	1	36	42	46	52	57	49	80	69	92	92	58	71	71	84	90	79	92	86	91	94	2	8	-4	2	-1
吴康连	FTCL	男	56	115	右	26	31	124	4	20	57	66	66	0.22			3	1	2	1	0	20	57	48	52	58	46	56	67	88	95	72	78	87	93	86	90	88	96	89	97	5	5	1	8	2
肖伟开	FTCL	男	60	155	右	20	24	101	8	25	40	40	45	0.33			2	3	3	2	1	43	38	43	48	56	51	64	70	87	89	63	67	75	78	94	75	85	81	92	93	1	9	-6	11	0
黄树娇	FTCL	女	70	160	右	24	28	114	3	30	48	53	73	0.2			3	2	1	1	1	32	44	54	54	57	80	68	69	90	91	69	79	72	86	90	83	90	90	90	91	3	6	4	5	3
陈永汉	FTCL	男	81	120	左	21	23	96	8	35	36	35	47	0.29			2	1	2	1	2	47	35	37	53	58	40	70	71	84	94	60	70	86	75	89	72	82	79	87	96	2	10	-8	7	-2
陈志红	FTCL	女	79	140	右	27	30	117	5	40	54	62	62	0.24			3	2	1	1	1	25	53	51	57	49	51	74	68	89	92	73	80	74	92	91	87	73	93	93	92	4	4	2	3	1
杨桂梅	FTCL	女	81	100	右	19	25	105	8	43	38	39	43	0.31			3	1	1	1	1	40	39	40	50	57	46	80	70	86	90	64	68	92	81	90	77	86	84	88	99	1	7	-1	10	-1
陈建珍	FTCL	女	76	155	右	25	29	122	2	22	52	59	67	0.17			2	3	2	3	0	23	50	55	55	56	47	55	70	91	93	71	81	79	95	88	86	89	97	91	95	3	3	6	6	4
谭焕兴	FTCL	女	68	135	右	22	24	108	7	38	34	32	50	0.28			2	2	3	1	1	50	33	45	52	58	49	63	74	87	91	57	72	84	73	92	71	84	77	89	91	2	8	-3	4	0
邱顺德	FTCL	男	67	135	左	26	31	92	8	31	50	56	74	0.23			3	2	1	1	1	34	48	42	58	57	45	67	69	85	98	74	82	68	90	90	84	91	91	92	98	4	5	8	11	2
罗结云	FTCL	女	75	145	左	20	25	111	4	19	41	41	58	0.32			3	1	1	1	1	21	41	49	47	56	51	70	66	90	89	61	69	88	80	87	76	87	82	90	94	1	9	-5	2	-2
高朝珍	FTCL	女	60	140	左	24	28	98	8	43	56	65	61	0.19			2	2	2	1	0	46	56	38	52	57	46	74	71	88	92	70	77	76	94	93	88	83	95	67	97	3	6	0	8	3
叶连英	FTCL	女	75	85	左	21	23	120	3	26	39	37	40	0.27			4	3	1	1	1	38	37	50	51	58	47	79	69	92	94	59	70	73	77	90	73	92	79	93	93	2	10	-7	9	-1
何爱群	FTCL	女	72	135	左	27	30	104	8	35	53	60	69	0.21			3	1	3	1	1	24	52	44	53	58	31	54	70	86	91	72	78	89	88	89	85	88	93	88	93	5	4	3	5	1
钟小桥	FTCL	女	60	110	左	19	24	113	5	29	35	34	51	0.34			2	2	2	1	2	41	34	47	49	57	50	63	68	89	93	62	39	77	72	91	78	85	83	91	96	1	7	-9	7	0
潘三女	FTCL	女	82	125	右	25	29	95	8	41	49	63	35	0.18			3	2	1	1	1	35	47	41	54	56	46	67	75	84	90	69	79	82	92	90	89	90	96	89	92	3	3	5	3	4
梁合玲	FTCL	女	75	160	左	22	25	123	2	20	42	43	68	0.26			4	1	1	1	1	29	40	53	50	57	47	69	70	91	92	58	71	69	83	88	74	81	80	92	99	2	8	-2	12	-2
陈日伦	FTCL	男	77	130	右	26	31	107	8	33	55	57	46	0.22			3	2	2	3	0	48	55	39	57	58	51	73	69	87	95	73	80	90	95	92	86	94	94	90	95	4	5	7	6	2
丁永军	FTCL	男	70	136	右	20	24	100	4	24	37	31	63	0.33			2	1	3	1	1	33	36	52	52	56	45	78	72	90	89	63	68	78	75	90	79	86	81	87	91	1	9	-4	4	-1
陈焕贞	FTCL	女	76	120	右	24	28	116	8	40	51	54	37	0.2			3	3	1	1	1	42	49	46	55	57	49	52	67	85	91	71	81	83	89	86	90	89	97	93	98	3	6	1	10	3
梁琼彩	FTCL	女	69	120	右	21	23	102	3	27	44	38	70	0.29			2	2	2	1	1	26	42	48	49	56	46	62	69	89	94	60	73	71	78	94	75	84	84	88	94	2	10	-6	2	0
袁球	FTCL	女	82	135	右	27	30	91	8	36	57	62	53	0.24			3	1	1	1	0	37	57	43	58	58	51	66	71	86	92	74	82	87	93	90	83	91	92	91	97	4	4	4	8	1
邹永谦	FTCL	女	69	135	右	19	25	119	5	21	40	35	75	0.31			3	2	1	1	1	30	38	54	53	57	33	69	70	92	90	64	69	75	71	89	72	87	78	89	93	1	7	-8	11	-2
区社其	FTCL	男	77	80	左	25	29	110	8	42	48	59	42	0.17			5	3	2	1	1	45	44	37	56	56	44	73	70	88	93	70	77	72	90	91	87	73	95	72	96	3	3	2	5	4
黄小灵	FTCL	女	68	135	右	22	24	93	2	25	36	33	64	0.28			3	2	1	1	1	39	35	51	51	57	46	77	68	87	91	57	70	86	79	90	77	92	82	90	96	2	8	-1	7	-1
梁合意	FTCL	女	78	155	右	26	31	125	7	32	54	64	48	0.23			2	1	3	3	0	22	53	40	60	58	51	50	69	99	95	72	78	74	94	88	85	88	96	87	92	5	5	6	3	2
宋惠卿	FTCL	女	78	110	右	20	25	108	8	18	38	40	71	0.32			4	2	2	1	1	49	39	55	48	57	47	62	76	84	89	61	67	93	74	92	71	85	79	93	99	1	9	-3	9	0
李胜云	FTCL	女	57	130	左	24	28	97	4	37	52	56	55	0.19			3	1	1	1	1	31	50	45	54	57	49	66	70	90	92	69	79	79	91	90	88	90	94	88	95	3	6	8	6	3
陈崇丽	FTCL	女	58	150	右	21	23	114	8	30	34	36	59	0.27			7	2	1	1	2	44	33	42	52	58	45	69	71	86	94	59	71	84	76	87	76	82	80	91	91	2	10	-5	4	-2
何耀强	FTCL	男	79	100	右	27	30	89	3	23	50	67	72	0.21			3	3	2	1	1	28	48	49	57	56	51	73	69	89	91	73	80	68	95	93	84	73	97	89	98	4	4	0	12	1
黄连娇	FTCL	女	58	170	右	19	24	127	8	39	41	42	44	0.34			3	2	3	1	1	36	41	38	50	57	46	77	68	85	93	62	68	88	80	90	73	86	83	92	94	1	7	-7	2	-1
卢树妹	FTCL	女	72	95	右	25	29	85	5	28	56	53	65	0.18			3	1	1	1	0	20	56	50	55	51	47	40	71	91	90	71	41	76	87	89	89	89	92	90	97	3	3	3	8	4
蚁行娟	FTCL	女	74	130	左	22	25	128	8	34	39	37	39	0.26			2	2	2	3	1	43	37	44	49	56	51	61	70	88	92	58	72	73	70	91	78	84	77	87	93	2	8	-9	10	0
罗映銮	FTCL	女	72	95	右	26	31	83	2	18	53	65	73	0.22			3	1	1	1	1	32	52	47	58	57	49	66	68	91	95	74	82	89	92	90	86	91	98	93	80	4	5	5	5	2
刘棣生	FTCL	女	79	120	右	20	24	126	8	20	35	39	56	0.33			3	3	1	1	1	47	34	41	53	58	46	69	70	92	89	63	69	77	77	88	72	87	81	88	96	1	9	-2	7	-2
曾根妹	FTCL	女	67	150	左	24	28	87	4	22	49	60	60	0.2			5	2	2	1	0	25	47	53	56	56	47	72	69	84	91	70	77	82	94	92	90	83	95	91	92	3	6	7	3	3
叶德连	FTCL	女	74	135	右	21	23	129	8	24	42	34	41	0.29			2	2	3	1	1	40	40	39	51	57	29	76	45	89	94	60	70	69	73	90	77	92	78	89	99	2	10	-4	11	-1
刘有崧	FTCL	女	75	145	右	27	30	82	3	26	55	63	74	0.24			3	1	1	1	1	23	55	52	59	58	45	35	70	86	92	72	78	90	89	86	85	88	96	92	95	5	4	1	6	1
温芹英	FTCL	女	80	135	右	19	25	130	8	28	37	41	49	0.31			4	2	1	1	1	50	36	46	52	57	50	61	71	90	90	64	66	78	75	94	74	85	82	90	91	1	7	-6	4	0
谭然	FTCL	女	72	125	右	25	29	84	5	30	51	58	66	0.17			3	3	2	1	0	34	49	48	54	56	46	66	68	87	93	69	79	83	93	90	88	90	94	87	98	3	3	4	9	4
张雪昌	FTCL	女	82	135	左	22	24	88	8	32	44	32	36	0.28			2	1	1	1	1	21	42	43	48	57	47	68	72	91	91	57	71	71	79	89	75	81	77	93	94	2	8	-8	2	-2
吴秀珍	FTCL	女	80	120	右	26	31	86	2	34	57	55	67	0.23			3	2	3	1	1	46	57	54	54	56	51	72	69	85	95	73	80	87	91	91	87	94	97	88	97	4	5	2	8	2
庞志兴	FTCL	女	83	125	右	20	25	90	7	22	40	38	52	0.32			3	1	2	2	2	38	38	37	50	57	49	76	70	89	89	61	68	75	72	90	71	86	80	91	93	1	9	-1	12	-1
杨雪梅	FTCL	女	62	150	右	24	28	81	8	31	48	64	68	0.19			2	2	1	1	1	24	44	51	55	58	46	30	67	88	92	71	81	72	95	88	89	89	95	89	96	3	6	6	5	3
陈凤玲	FTCL	女	83	90	右	21	23	128	4	38	36	36	45	0.27			4	2	1	1	1	41	35	40	53	56	47	60	69	92	94	59	73	86	78	92	76	84	79	92	96	2	10	-3	7	0
徐享	FTCL	男	73	170	左	27	30	83	8	19	54	61	75	0.21			3	3	2	1	0	35	53	55	58	57	51	65	71	86	91	74	82	74	88	90	84	91	98	90	92	4	4	8	3	1
刘桂华	FTCL	女	77	125	左	19	24	126	3	43	38	33	54	0.34			2	1	3	1	1	29	39	45	52	58	45	68	68	90	93	62	69	94	71	87	73	87	81	87	99	1	7	-5	10	-2
李淑华	FTCL	女	83	120	左	25	29	87	8	26	52	66	61	0.18			3	2	1	1	1	48	50	42	56	57	88	72	70	84	90	70	77	79	94	93	90	83	94	93	95	3	3	0	6	4
陆秋生	FTCL	女	71	95	左	22	25	129	5	34	34	40	38	0.26			3	1	2	3	1	33	33	49	49	57	46	76	69	89	92	58	70	84	76	90	78	92	76	88	91	2	8	-7	4	-1
胡海燕	FTCL	男	60	100	左	26	31	82	8	29	50	57	69	0.22			4	3	1	1	0	42	48	38	53	56	47	97	70	87	95	72	78	68	92	89	86	88	97	91	98	5	5	3	11	2
陈万好	FTCL	女	73	95	左	20	24	130	2	41	41	35	57	0.33			2	2	1	1	1	26	41	50	51	58	51	60	68	91	89	63	67	88	74	91	72	85	80	89	94	1	9	-9	2	0
谈玉珍	FTCL	女	66	175	右	24	28	84	8	20	56	62	62	0.2			3	1	2	1	1	37	56	44	54	57	49	65	72	85	91	69	79	76	90	90	88	90	96	92	97	3	6	5	8	3
张文萍	FTCL	女	75	175	右	21	23	88	4	33	39	37	43	0.29			3	2	1	1	1	30	37	47	50	56	46	68	70	93	94	60	71	73	70	88	75	82	78	90	93	2	10	-2	9	-2
李谷仙	FTCL	女	68	123	左	27	30	86	8	24	53	59	70	0.24			5	2	3	1	0	45	52	41	52	48	47	71	70	88	92	73	80	89	95	92	87	93	95	87	100	4	4	7	5	1
孙会娟	FTCL	女	56	105	右	19	25	90	3	40	35	34	50	0.31			2	1	2	1	1	39	34	53	53	58	51	75	69	86	90	64	68	77	77	90	74	86	77	93	96	1	7	-4	7	-1
胡桂兰	FTCL	女	60	145	右	25	29	81	8	27	49	65	63	0.17			7	3	1	1	1	22	47	39	55	58	45	92	68	92	93	71	81	82	93	86	89	89	98	88	92	3	3	1	3	4
杨玉丽	FTCL	女	70	100	右	22	24	125	5	36	42	39	40	0.28			3	2	1	1	1	49	40	52	49	57	50	59	71	87	91	57	72	69	73	94	77	84	79	91	99	2	8	-6	12	0
曲润苓	FTCL	女	81	100	右	26	31	89	8	21	55	56	71	0.23			2	1	2	1	0	31	55	46	51	56	46	65	86	89	73	74	82	90	91	90	85	91	96	89	95	4	5	4	6	2
刘棣生	FTCL	女	79	90	左	20	25	127	2	42	37	32	58	0.32			3	2	3	3	1	44	36	48	52	57	86	68	72	84	89	61	69	78	69	89	71	87	75	92	91	1	9	-8	4	-1
吴瑞珍	FTCL	女	81	155	右	24	28	85	8	25	51	63	64	0.19			3	1	1	1	1	28	49	43	56	58	51	71	65	90	92	70	77	83	94	91	88	83	97	70	98	3	6	2	10	3
蔡润凤	FTCL	女	76	110	右	21	23	128	4	32	44	38	47	0.27			2	2	2	1	1	36	42	54	51	56	49	75	68	86	94	59	70	71	75	90	76	92	78	87	94	2	10	-1	2	0
黄建玲	FTCL	女	68	125	左	27	30	83	8	18	57	60	65	0.21			4	3	1	2	0	20	57	37	52	49	75	88	71	92	91	72	61	87	92	58	84	68	95	72	85	5	7	6	8	1
